# Supplementary material for: Electronic state evolution of oxygen-doped monolayer WSe2 assisted by femtosecond laser irradiation
Source: Royal Society of Chemistry journal article supplement (doi:10.1039/d2cp04495a), 2022-11-10
Supplement: d2cp04495a1.pdf [file d2cp04495a1.pdf]

Supporting Information for

## **Electronic state evolution of oxygen-doped monolayer**

### **WSe<sub>2</sub> assisted by femtosecond laser irradiation**

*Lei Wang,<sup>at</sup> Dan Wang,<sup>bt</sup>, Yang Luo,<sup>act</sup> Chen-Yu Xu,<sup>a</sup> Lin Cui,<sup>a</sup> Xian-Bin Li,<sup>a</sup> and Hong-Bo Sun<sup>d</sup>*

<sup>a</sup>State Key Laboratory of Integrated Optoelectronics, College of Electronic Science and Engineering, Jilin University, Changchun 130012, China

<sup>b</sup>State Key Laboratory of Precision Measurement and Technology, Department of Precision Instrument, Tsinghua University, Haidian, Beijing 100084, China

<sup>c</sup>Changchun Institute of Optics, Fine Mechanics and Physics, Chinese Academy of Sciences, Changchun 130033, China.

<sup>d</sup>Department of Mechanical Engineering and Materials Science, Yale University, New Haven, CT 06511, United States.

#### **Corresponding Author**

\* Hong-Bo Sun, Email: [hbsun@tsinghua.edu.cn](mailto:hbsun@tsinghua.edu.cn)

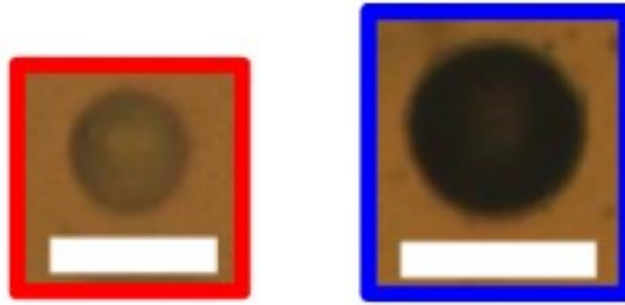

**Figure S1.** Micro-zone optical images for IFsLI case 1 in a red square and IFsLI case 2 in a blue square, respectively (scale bar, 500  $\mu\text{m}$ ), where the light-yellow background is covered by the pristine monolayer  $\text{WSe}_2$  film, the brown spot with a diameter of  $\sim 300 \mu\text{m}$  for IFsLI case 1 and a darker and larger modified spot with a diameter of  $\sim 400 \mu\text{m}$  for IFsLI case 2 are the femtosecond laser modification areas caused by pump pulses..

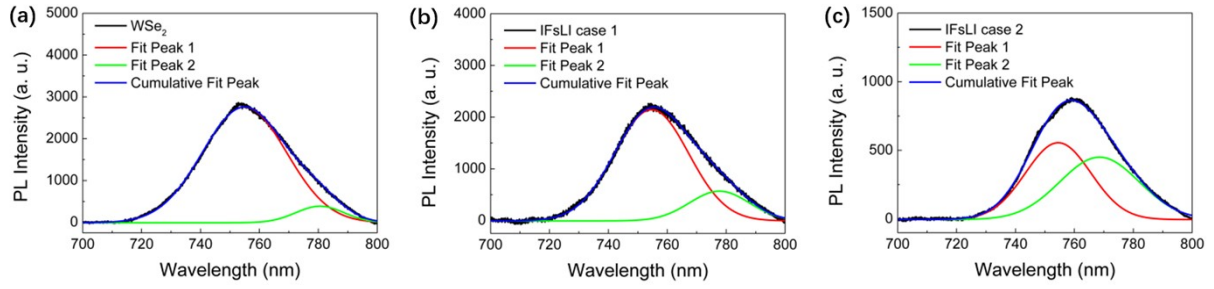

**Figure S2.** Two-peak fitting for the steady-state PL spectra of (a) pristine monolayer WSe<sub>2</sub> on the sapphire substrate, (b) monolayer WSe<sub>2</sub> with a moderate modification (IFsLI case 1) and (c) monolayer WSe<sub>2</sub> with a strong modification (IFsLI case 2). The peak 1 could be the radiative recombination of band-edge excitons. The peak 2 could be attributed to the defects.<sup>1</sup>

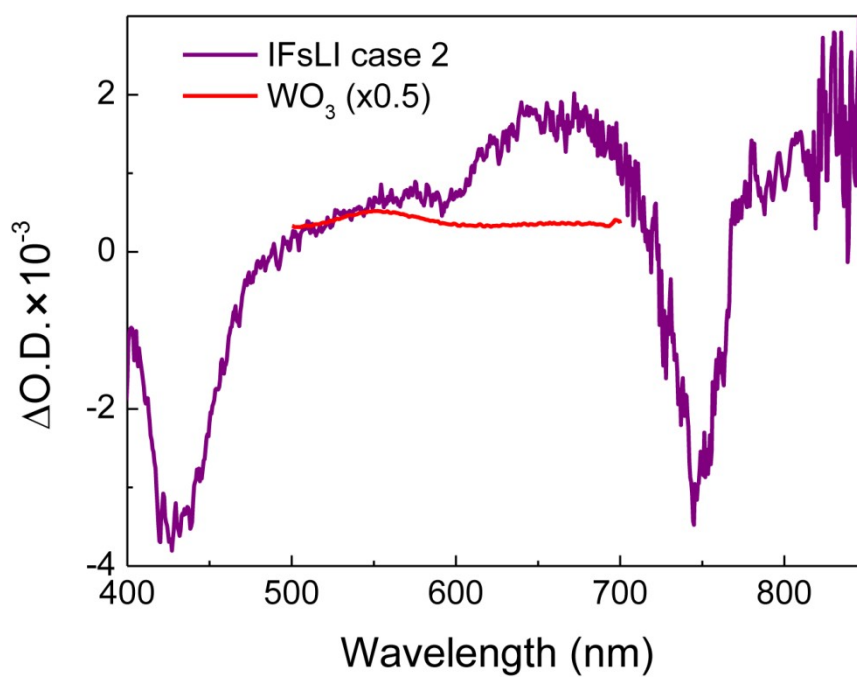

**Figure S3.** Comparison between initial TA spectra at 1 ps of monolayer WSe<sub>2</sub> with a strong modification (IFsLI case 2) and WO<sub>3</sub> (multiplying by a factor of 0.5) in ref. S2, where the transient signal at ~550 nm is assigned to the photogenerated holes on WO<sub>3</sub>.

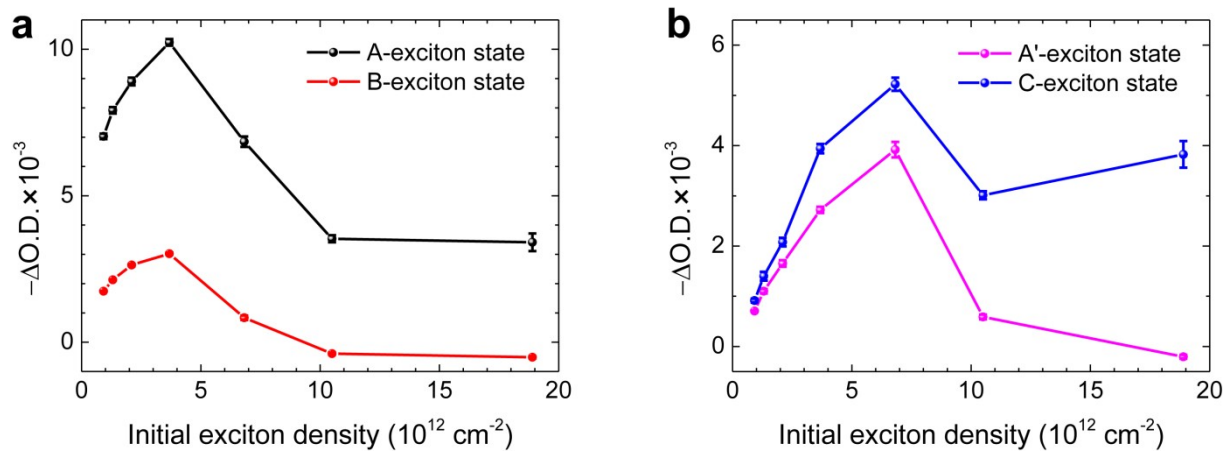

**Figure S4.** The exciton-density-dependent initial amplitude of GSB signals for (a) A-/B-exciton states, and (b) A'-/C-exciton states.

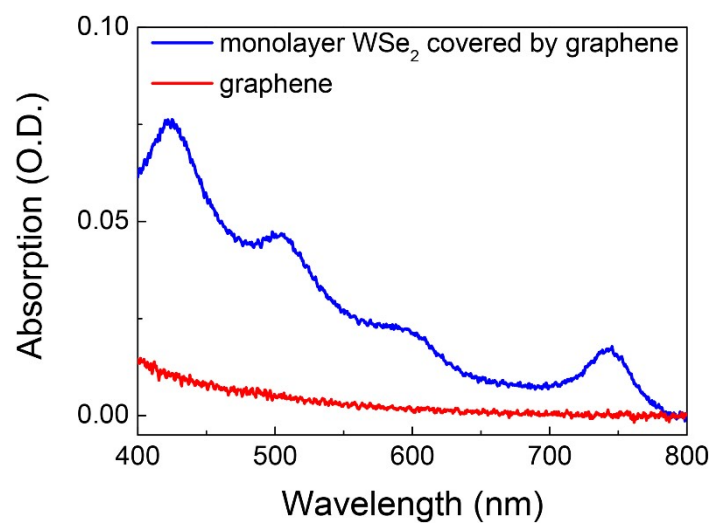

**Figure S5.** Steady-state absorption spectra of graphene and monolayer WSe<sub>2</sub> covered by graphene.

**Table S1.** Parameters for the PL peak fitting of monolayer WSe<sub>2</sub> with/without IFsLI treatments

|                                     | Peak 1 (nm) | Peak 2 (nm) | Spectral weight for Peak 1 % | Spectral weight for Peak 2 % |
|-------------------------------------|-------------|-------------|------------------------------|------------------------------|
| Pristine monolayer WSe <sub>2</sub> | 754.9       | 780.5       | 92                           | 8                            |
| IFsLI case 1                        | 754.7       | 777.7       | 82                           | 18                           |
| IFsLI case 2                        | 754.5       | 768.5       | 51                           | 49                           |

**Table S2.** Parameters for the XPS peak fitting of monolayer WSe<sub>2</sub> with/without IFsLI treatments

| Bonding                                                                                   | Pristine monolayer WSe <sub>2</sub> |           |        | IFsLI case 1        |           |        | IFsLI case 2        |           |        |
|-------------------------------------------------------------------------------------------|-------------------------------------|-----------|--------|---------------------|-----------|--------|---------------------|-----------|--------|
|                                                                                           | Binding energy (eV)                 | FWHM (eV) | Area % | Binding energy (eV) | FWHM (eV) | Area % | Binding energy (eV) | FWHM (eV) | Area % |
| W4f <sub>7/2</sub> WSe <sub>2</sub>                                                       | 32.49                               | 1.25      | 35.69  | 32.77               | 0.96      | 36.54  | 32.43               | 0.97      | 32.25  |
| W4f <sub>5/2</sub> WSe <sub>2</sub>                                                       | 34.90                               | 1.84      | 46.00  | 34.93               | 1.04      | 29.69  | 34.55               | 0.99      | 24.18  |
| W5p <sub>3/2</sub> WSe <sub>2</sub>                                                       | 37.77                               | 2.10      | 18.31  |                     |           |        |                     |           |        |
| W4f <sub>7/2</sub> WO <sub>3</sub>                                                        |                                     |           |        | 36.26               | 1.36      | 16.37  | 36.04               | 1.54      | 22.99  |
| Overlapping of W4f <sub>5/2</sub> WO <sub>3</sub> and W5p <sub>3/2</sub> WSe <sub>2</sub> |                                     |           |        | 38.32               | 1.51      | 17.40  | 38.19               | 1.59      | 20.58  |



**Table S3.** Formation energy of  $V_{Se}$  and  $O_{Se}$  under the W-rich condition and Se-rich condition.

| Formation energy (eV)        | W-rich | Se-rich |
|------------------------------|--------|---------|
| $V_{Se}$                     | 1.61   | 2.44    |
| $O_{Se}$ ( $O_2$ reservoir)  | -2.63  | -1.81   |
| $O_{Se}$ ( $WO_3$ reservoir) | 0.15   | 0.42    |

**Table S4.** Femtosecond time-resolved TA dynamics parameters obtained by multiple-exponential fitting under 400 nm excitation.

|                                         | Lifetime component | $\tau_1$ (ps)   | $\tau_2$ (ps)  | $\tau_3$ (ps) | $\tau_{ave}$ (ps) |        |
|-----------------------------------------|--------------------|-----------------|----------------|---------------|-------------------|--------|
| monolayer WSe <sub>2</sub>              | A exciton          | 3.7<br>(57.7%)  | 39<br>(33.3)   | 605<br>(9.0%) | 69.5              |        |
|                                         | B exciton          | 0.37<br>(37.5%) | 4.5<br>(43.6%) | 63<br>(18.9%) | 14.0              |        |
|                                         | C exciton          | 12<br>(56.9%)   | 84<br>(43.1%)  |               | 43                |        |
|                                         | Lifetime component | $\tau_1$ (ps)   | $\tau_2$ (ps)  | $\tau_3$ (ps) | $\tau_{ave}$ (ps) | $\eta$ |
| monolayer WSe <sub>2</sub><br>/Graphene | A exciton          | 0.60<br>(55.4%) | 2.8<br>(38.9%) | 114<br>(5.7%) | 7.9               | 0.89   |
|                                         | B exciton          | 0.37<br>(66.2%) | 1.7<br>(25.3%) | 15<br>(8.5%)  | 2.0               | 0.86   |
|                                         | C exciton          | 0.69<br>(56.5%) | 20<br>(43.5%)  |               | 9.1               | 0.79   |

carrier extraction efficiency:  $\eta = 1 - \tau_{\text{WSe}_2 - \text{Graphene}} / \tau_{\text{WSe}_2}$

## REFERENCES

- (1) H. G. Ji, P. Solís-Fernández, D. Yoshimura, M. Maruyama, T. Endo, Y. Miyata, S. Okada, H. Ago, *Adv. Mater.*, **2019**, 31, 1903613.
- (2) D. Li, R. T. Chen, S. Y. Wang, X. W. Zhang, Y. Zhang, J. X. Liu, H. Yin, F. T. Fan, J. Y. Shi, C. Li, *J. Phys. Chem. Lett.*, **2020**, 11, 412-418.
